# Supplementary material
Source: MDPI journal article supplement (https://www.mdpi.com/2072-4292/13/3/399)
Supplement: s1 [file s1]

## Supplementary file

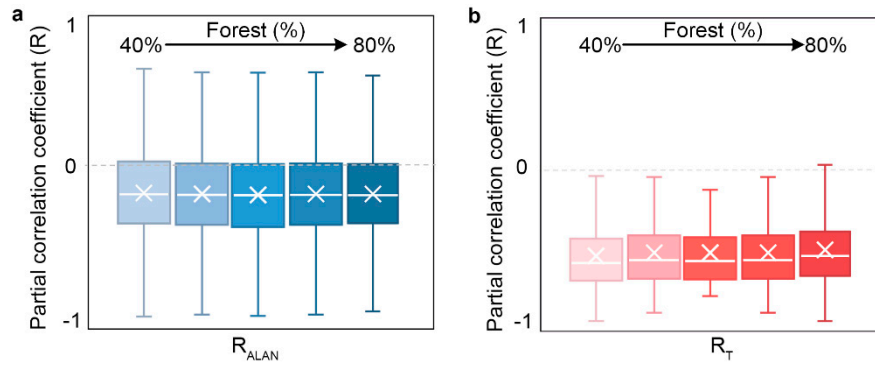

**Figure S1.** Partial correlation analysis with different forest fraction threshold from 40% to 80% with a 10% interval. RALAN (a); RT (b).
